# Supplementary material for: First measurements of reactive α-dicarbonyl concentrations on PM 2.5 aerosol over the Boreal forest in Finland during HUMPPA-COPEC 2010 – source apportionment and links to aerosol aging
Source: Copernicus journal article supplement (doi:10.5194/acp-12-6145-2012), 2012-07-17
Supplement: Supplementary file 1 [file acp-12-6145-2012-supplement.pdf]

# Atmospheric Chemistry and Physics

## Electronic Supporting Material

### **First measurements of reactive $\alpha$ -dicarbonyl concentrations on PM<sub>2.5</sub> aerosol over the Boreal forest in Finland during HUMPPA-COPEC 2010 – Source apportionment and links to aerosol aging**

Christopher J. Kampf<sup>1</sup>, Ashley L. Corrigan<sup>2</sup>, Aaron M. Johnson<sup>3\*</sup>, Wei Song<sup>3</sup>, Petri Keronen<sup>4</sup>,  
Rainer Königstedt<sup>3</sup>, Jonathan Williams<sup>3</sup>, Lynn M. Russell<sup>2</sup>, Tuukka Petäjä<sup>4</sup>, Horst Fischer<sup>3</sup>,  
and Thorsten Hoffmann<sup>1</sup>

<sup>1</sup>Institut für Anorganische und Analytische Chemie, Johannes Gutenberg-Universität, Mainz, Germany

<sup>2</sup>Scripps Institution of Oceanography and the University of California, San Diego, La Jolla, CA 92093, USA

<sup>3</sup>Max Planck Institute for Chemistry, 55128 Mainz, Germany

<sup>4</sup>Dept Phys, FI-00014 University of Helsinki, Finland

\*Now at Brigham Young University – Idaho, Dept. of Chemistry, Rexburg, ID 83460,

Corresponding author: Thorsten Hoffmann

Email: hoffmant@uni-mainz.de

# **Back trajectories during the HUMPPA-COPEC-2010 field measurement intensive in Hyytiälä, Finland, 2010**

96 h backward trajectories were calculated using the NOAA Hysplit model at an altitude of 25 m above ground level (a.g.l.) for the sampling site located at 61° 50' 50.685" North, 24° 17' 41.206" East, 179m above sea level (a.s.l.).

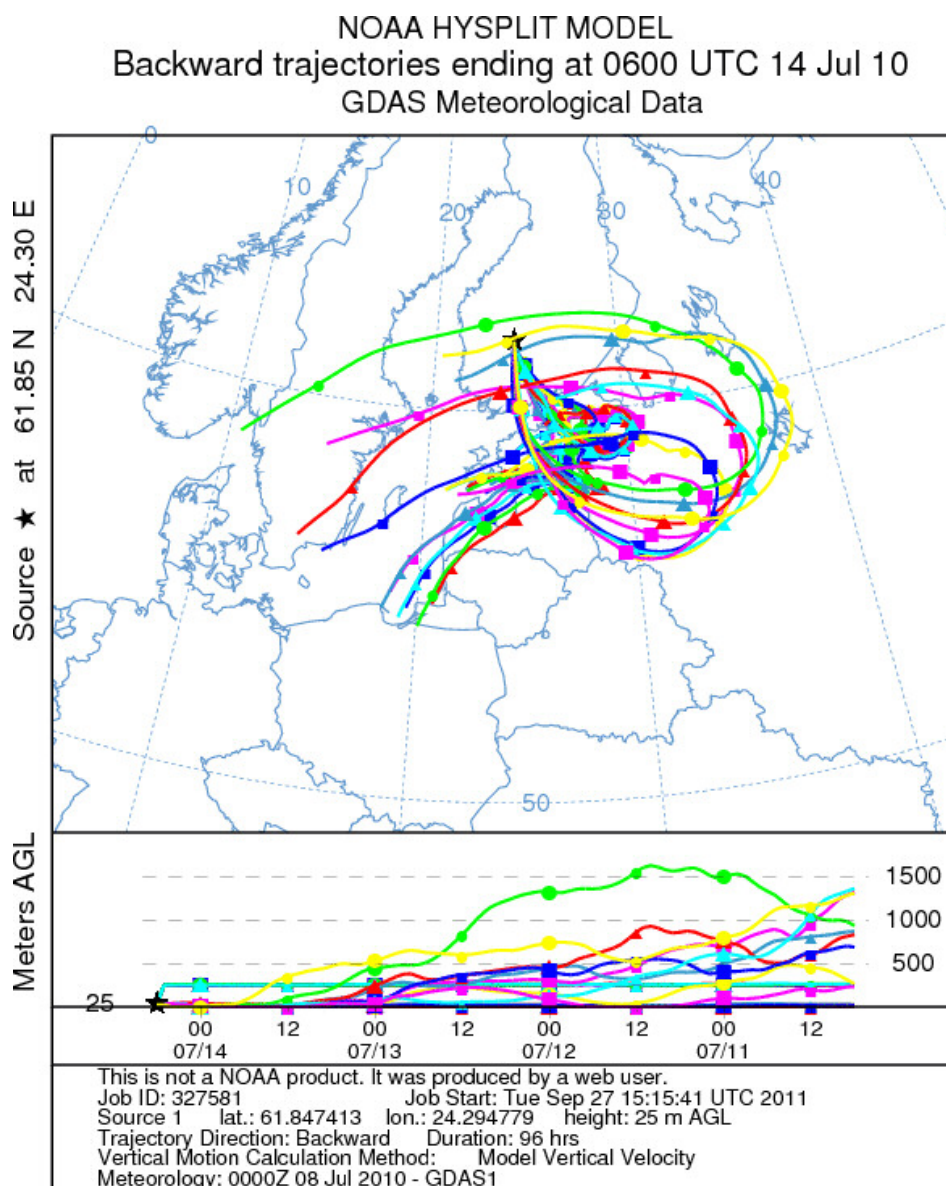

Figure S1. Ensemble 4 day back trajectories for the urban pollution plume event on 14 July

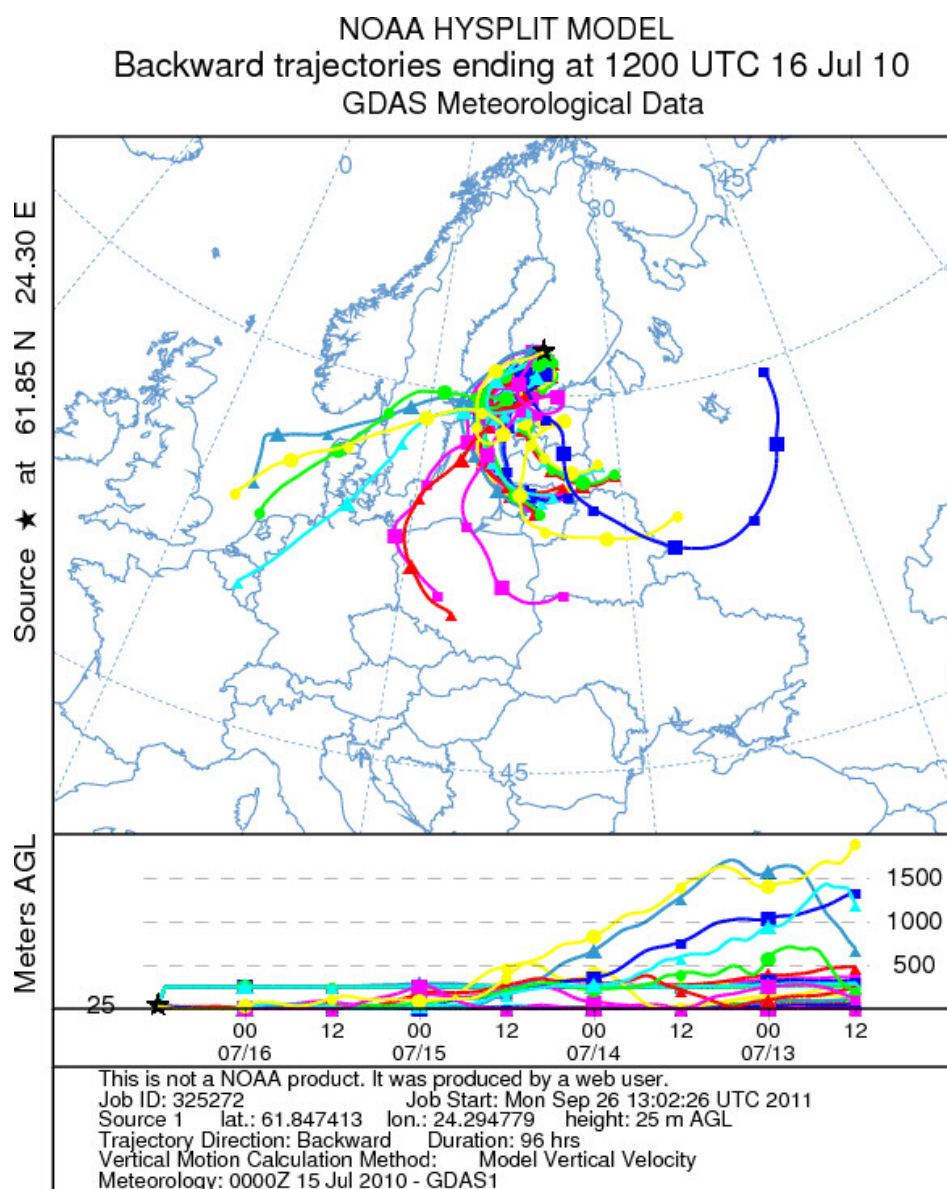

Figure S2. Ensemble 4 day back trajectories for the urban pollution plume event on 16 July

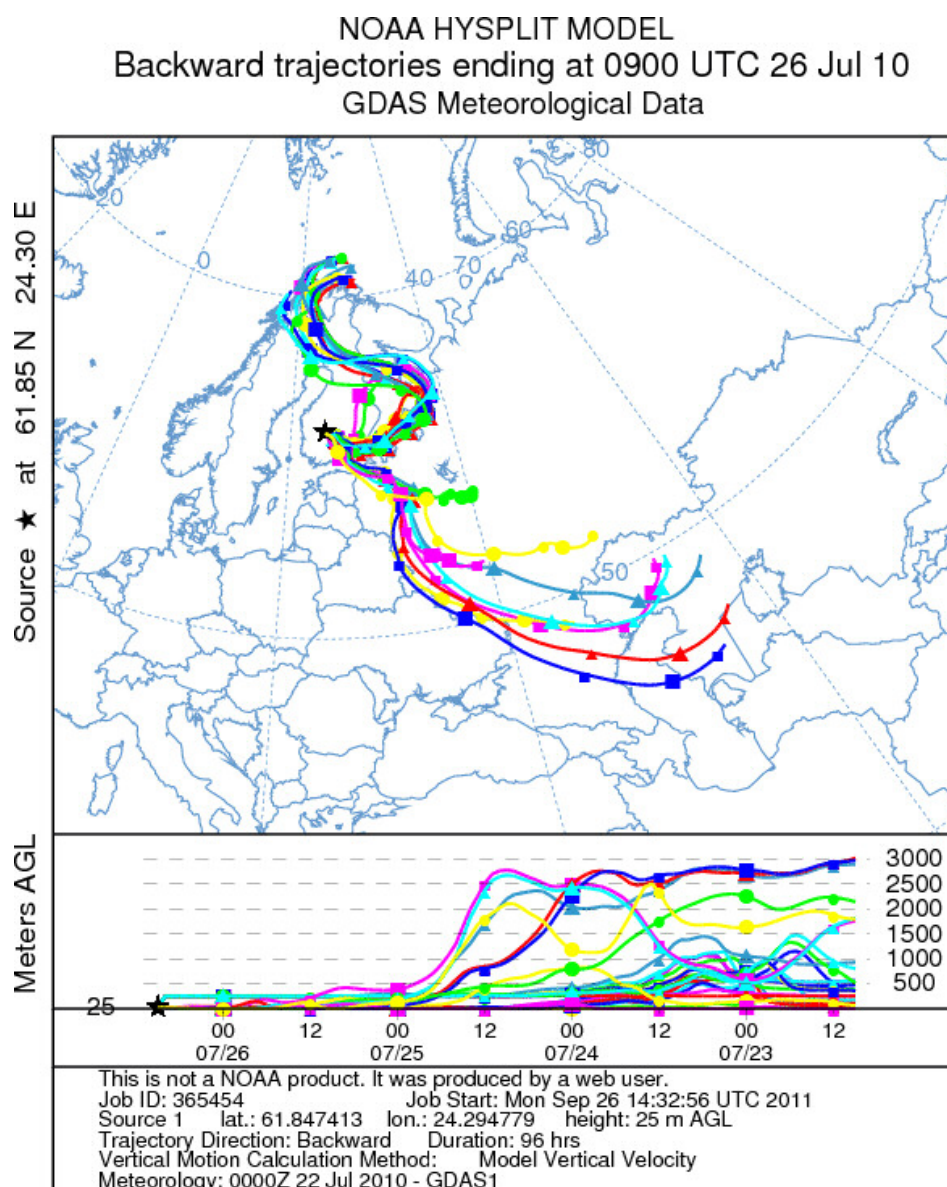

Figure S3. Ensemble 4 day back trajectories for the biomass burning / urban pollution plume event on 26 July

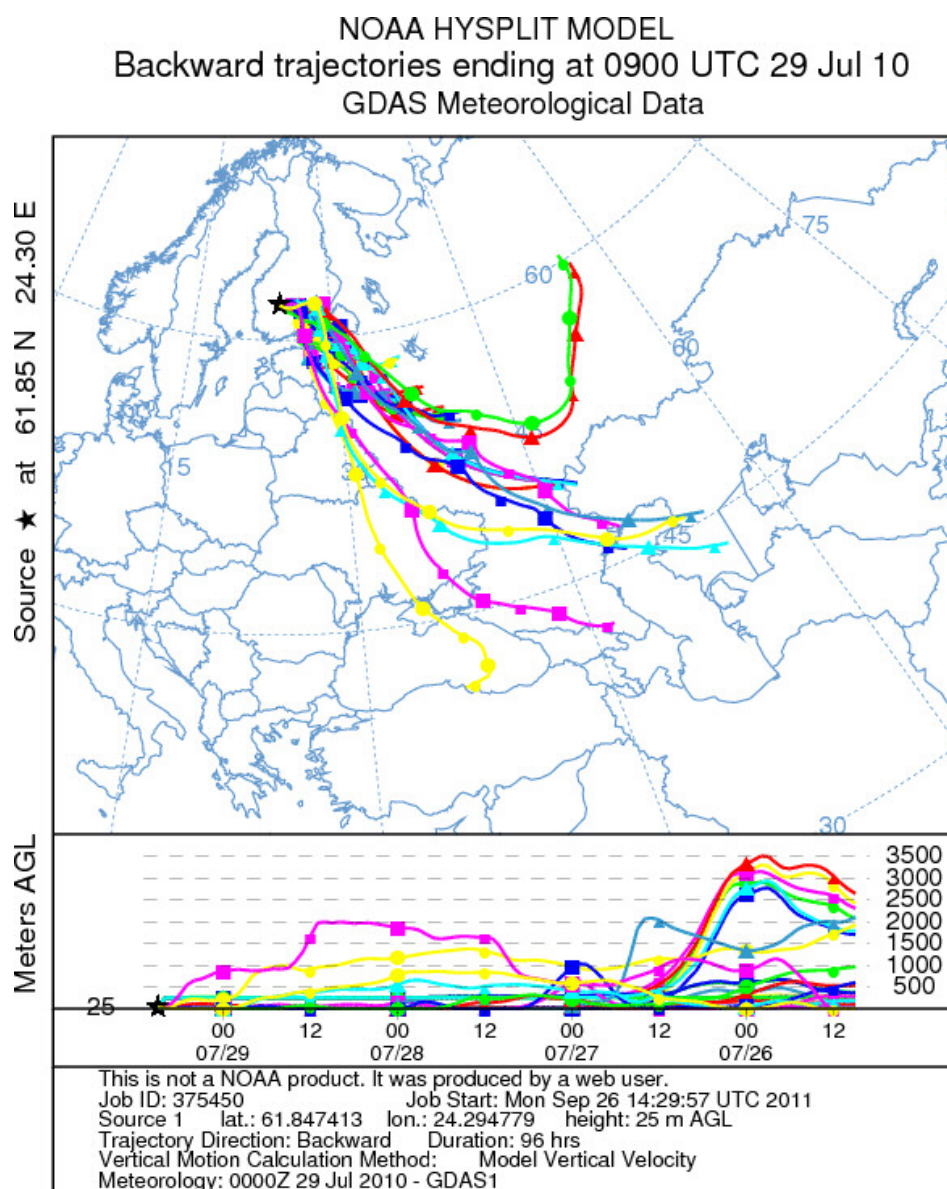

Figure S4. Ensemble 4 day back trajectories for the biomass burning / urban pollution plume event on 29 July

NOAA HYSPLIT MODEL  
Backward trajectories ending at 0000 UTC 06 Aug 10  
GDAS Meteorological Data

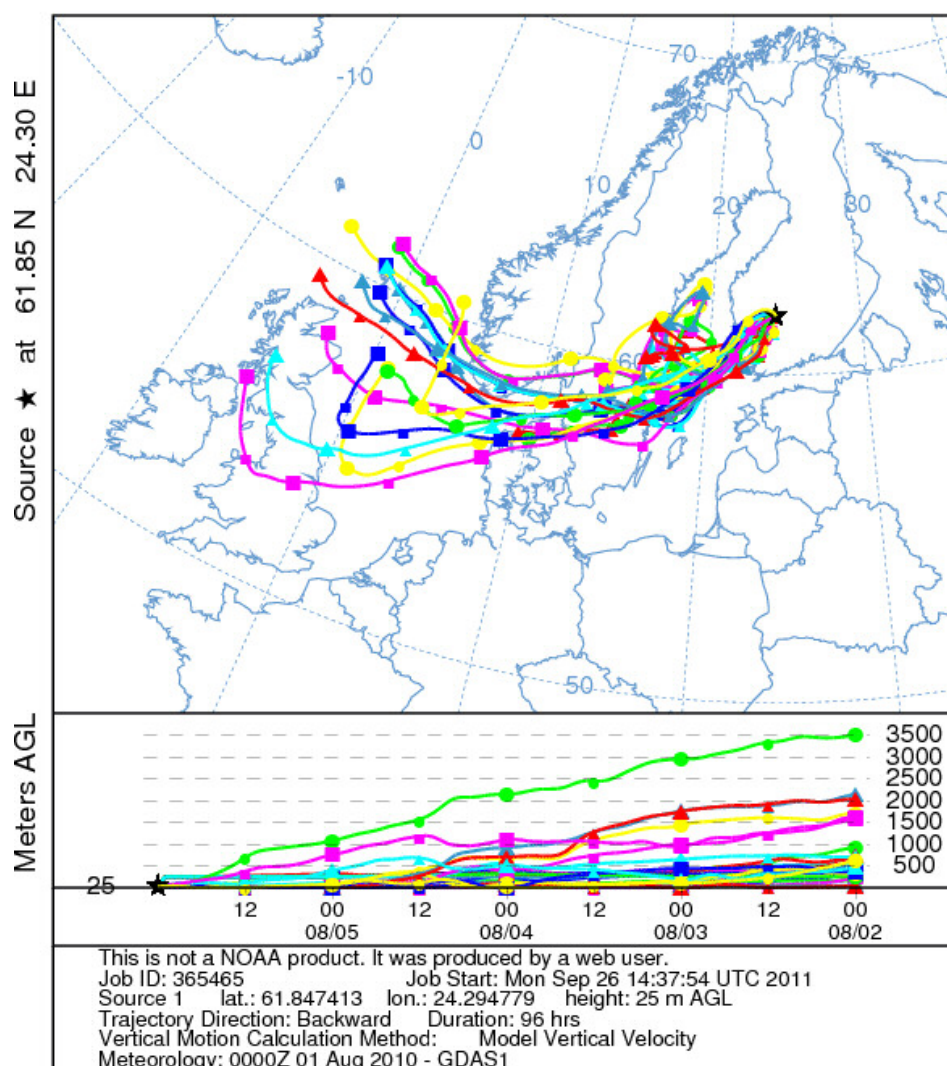

Figure S5. Ensemble 4 day back trajectories for the sawmill / urban pollution plume event on 6 August

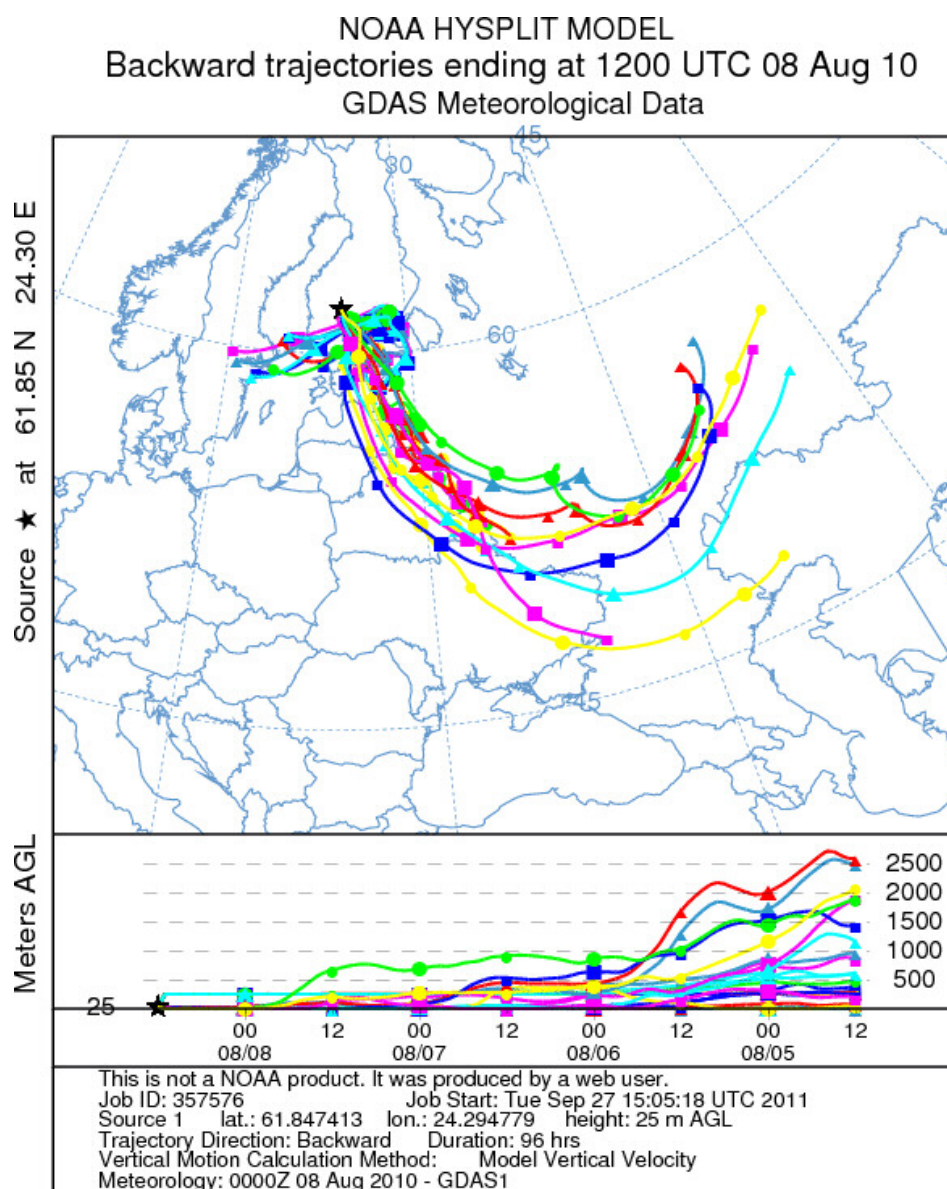

Figure S6. Ensemble 4 day back trajectories for the biomass burning event on 8 August

48 h backward trajectories were calculated using the NOAA Hysplit model at an altitude of 25 m above ground level (a.g.l.) for the sampling site located at 61° 50' 50.685" North, 24° 17' 41.206" East, 179m above sea level (a.s.l.).

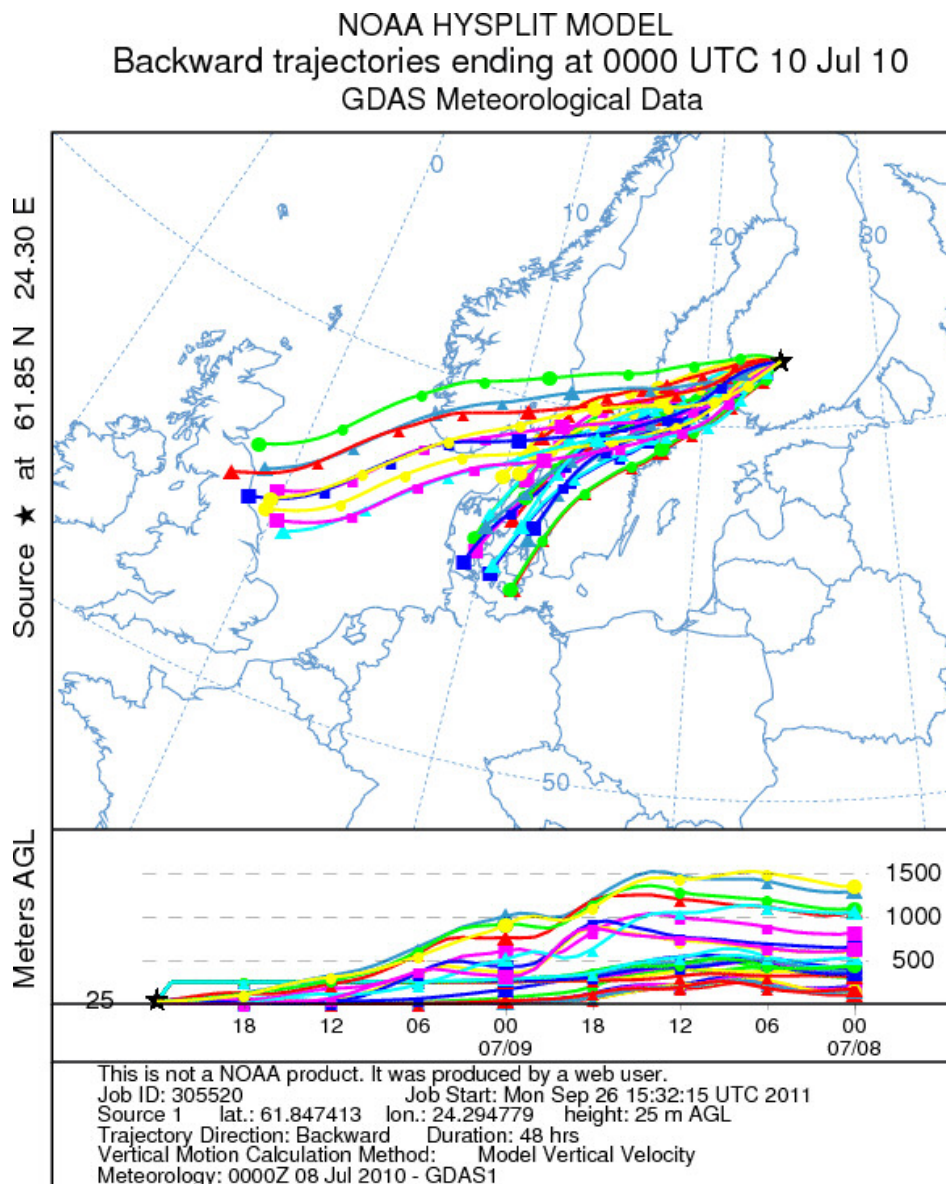

Figure S7. Ensemble back trajectories for the urban pollution plume / traffic at site event on 10 July

96 h backward trajectories were calculated using the NOAA Hysplit model at an altitude of 200 m above ground level (a.s.l.) for the sampling site located at 61° 50' 50.685" North, 24° 17' 41.206" East, 179m above sea level (a.s.l.) and plotted together with fire hotspot data, for fires with >90% confidence, provided by the Fire Information for Resource Management System (FIRMS) for the biomass burning events on 7 to 9 August. Back trajectories and active hot spots for specific dates are colored. Black squares indicate sampling site and predominant nearby cities: Helsinki, Finland, Oslo, Norway, St. Petersburg and Moscow, Russia.

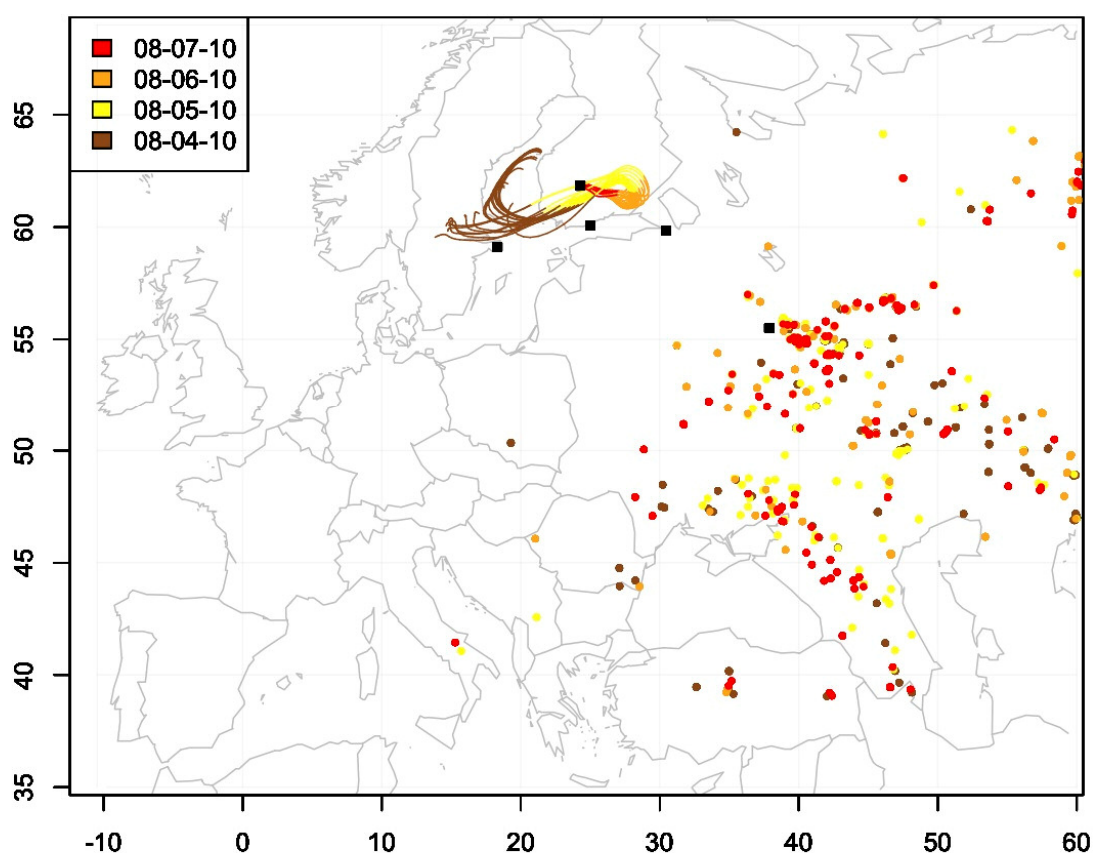

Figure S8. Ensemble 4 day back trajectories for the biomass burning event on 7 August

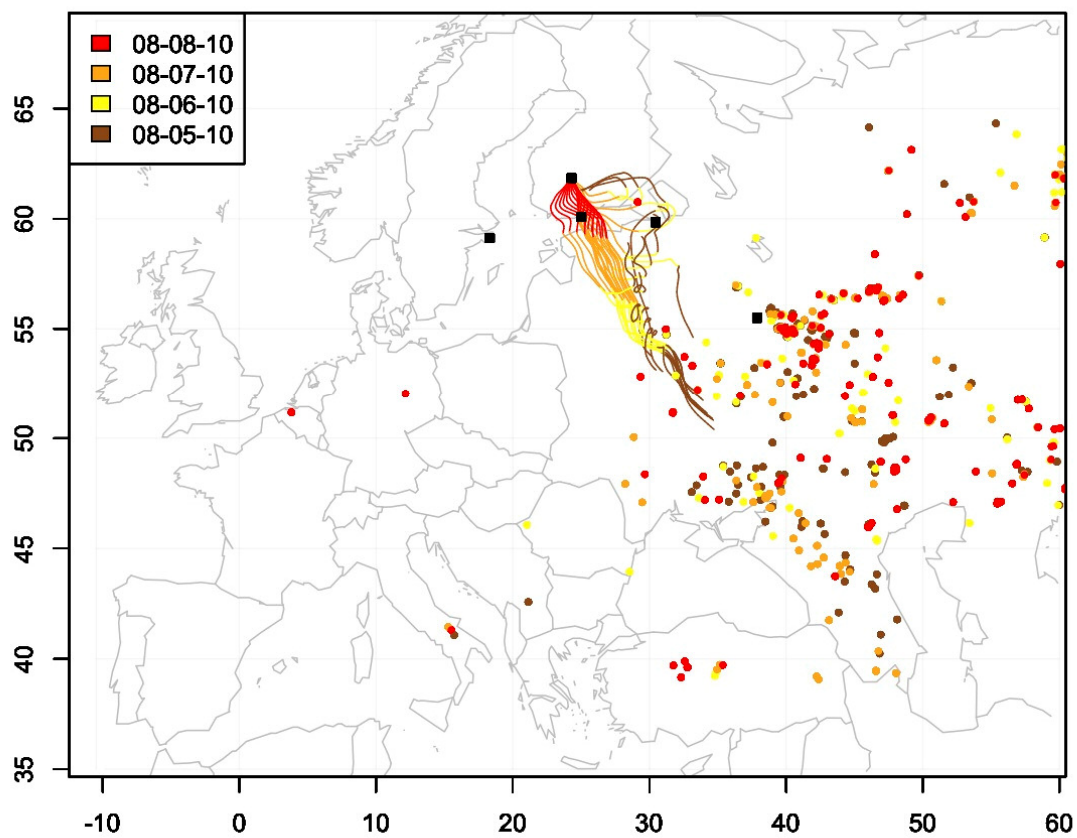

Figure S9. Ensemble 4 day back trajectories for the biomass burning event on 8 August

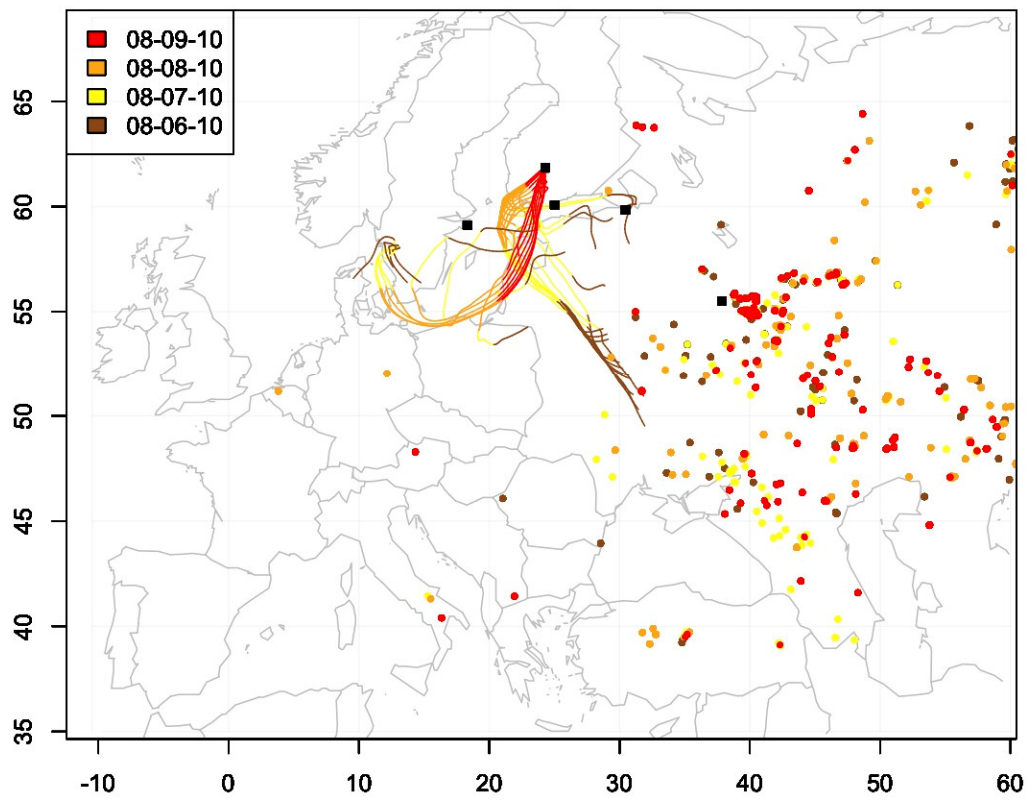

Figure S10. Ensemble 4 day back trajectories for the biomass burning event on 9 August
